# Supplementary material for: Nutritional Composition and Estimated Iron and Zinc Bioavailability of Meat Substitutes Available on the Swedish Market
Source: MDPI journal article supplement (doi:10.3390/nu14193903), 2022-09-21
Supplement: s1 [file s1]

**Table S1. Source of added fat, as stated on the packaging of the product, for each meat substitute included in the study**

| <b>Product name</b>     | <b>Added fat</b>                   |
|-------------------------|------------------------------------|
| Cheese patties 1        | Sunflower oil                      |
| Cheese patties 2        | Sunflower and rapeseed oil         |
| Chick pea falafel 1     | Rapeseed oil                       |
| Chick pea falafel 2     | Rapeseed oil                       |
| Farm bean sausage       | Sunflower oil                      |
| Mycoprotein bites       | No added fat                       |
| Mycoprotein burger      | Coconut, shea or palm and rapeseed |
| Mycoprotein filets      | No added fat                       |
| Mycoprotein mince       | No added fat                       |
| Mycoprotein schnitzel   | Sunflower and rapeseed oil         |
| Oat and bean bites      | Rapeseed oil                       |
| Pea balls 1             | Rapeseed oil                       |
| Pea balls 2             | Rapeseed oil                       |
| Pea burger 1            | Coconut, shea or palm and rapeseed |
| Pea burger 2            | Coconut and sunflower oil          |
| Pea mince               | Rapeseed oil                       |
| Pea nuggets 1           | Rapeseed oil                       |
| Pea patties             | Rapeseed oil                       |
| Pea sausage 1           | Coconut, shea or palm and rapeseed |
| Pea sausage 2           | Coconut, shea or palm and rapeseed |
| Pea sausage 3           | Sunflower oil                      |
| Pea sausage 4           | Rapeseed oil                       |
| Pea schnitzel           | Rapeseed oil                       |
| Soy and wheat bacon     | Sunflower oil                      |
| Soy and wheat balls 1   | Sunflower and rapeseed oil         |
| Soy and wheat balls 2   | Rapeseed oil                       |
| Soy and wheat balls 3   | Sunflower oil                      |
| Soy and wheat burger    | Sunflower and rapeseed oil         |
| Soy and wheat nuggets   | Rapeseed oil                       |
| Soy and wheat sausage   | Sunflower and rapeseed oil         |
| Soy and wheat schnitzel | Sunflower oil                      |
| Soy balls               | Rapeseed oil                       |
| Soy burger              | Rapeseed oil                       |
| Soy mince 1             | Rapeseed oil                       |
| Soy mince 2             | Rapeseed oil                       |
| Soy nuggets             | Sunflower and rapeseed oil         |
| Soy sausage 1           | Rapeseed oil                       |
| Soy sausage 2           | Coconut, shea or palm and rapeseed |
| Soy schnitzel 2         | Sunflower oil                      |
| Soy schnitzel 3         | Rapeseed oil                       |
| Tempeh Burger           | Rapeseed oil                       |
| Wheat and pea nuggets   | Rapeseed oil                       |
| Wheat fish sticks       | Rapeseed oil                       |
| White bean balls        | Rapeseed oil                       |
